# Supplementary material for: The effect of omega-3 fatty acids on central nervous system remyelination in fat-1 mice
Source: BMC Neurosci. 2017 Jan 24;18:19. doi: 10.1186/s12868-016-0312-5 (PMC5259863; doi:10.1186/s12868-016-0312-5)
Supplement: Supplementary file 4 — Additional file 4. Data generated or analysed during this study are included in Additional file 1. [file 12868_2016_312_MOESM4_ESM.xlsx]

## Sheet: tail GC
		AA	EPA	DHA
		n-6	n-3	n-3
		%	%	%
Group	Phenotype
control	wt	32.1305	0	2.81229
control	wt	31.1965	0	2.6862
control	wt	27.1052	0	3.04624
control	wt	27.828	0	2.93404
cuprizone	wt	34.004	0	3.72627
cuprizone	wt	32.9486	0	3.30251
cuprizone	wt	31.3891	0	2.75443
cuprizone	wt	33.1888	0	2.96187
cuprizone	wt	35.6708	0	6.56415
remyelin	wt	34.6742	0	2.63275
remyelin	wt	32.6757	0	2.55198
remyelin	wt	31.6738	0	2.8395
remyelin	wt	30.3816	0	2.57227
remyelin	wt	31.0187	0	2.537
control	fat-1	2.66864	10.1039	9.79686
control	fat-1	3.15124	10.6455	10.6457
control	fat-1	3.04514	9.22501	9.37204
control	fat-1	3.12212	9.23073	10.3883
cuprizone	fat-1	5.25703	10.6924	11.4629
cuprizone	fat-1	0	10.3205	11.6308
cuprizone	fat-1	4.16227	10.1596	9.82645
cuprizone	fat-1	3.88578	9.36688	10.8971
cuprizone	fat-1	0	0	15.264
cuprizone	fat-1	7.70784	11.6921	14.6706
cuprizone	fat-1	11.1118	8.01937	10.3337
remyelin	fat-1	3.08852	10.1043	9.66994
remyelin	fat-1	0	11.2939	10.4817
remyelin	fat-1	3.79092	9.72547	8.93346
remyelin	fat-1	4.39044	9.90341	10.7903
remyelin	fat-1	2.76583	10.6043	9.79067
remyelin	fat-1	4.44469	11.6667	13.3744
remyelin	fat-1	0	8.77559	9.20781

## Sheet: brain GC LC MS
	AA	EPA	DHA		5-HETE	8-HETE	9-HETE	11-HETE	12-HETE	15-HETE	19-HETE	20-HETE	HETE total		5-HEPE	8-HEPE	9-HEPE	12-HEPE	15-HEPE	18-HEPE	19-HEPE	20-HEPE	HEPE total		4-HDHA	7-HDHA	8-HDHA	10-HDHA	11-HDHA	13-HDHA	14-HDHA	16-HDHA	17-HDHA	20-HDHA	21-HDHA	22-HDHA	HDHA total
wt	2147.2	0	3766.6		585.7	464	145.3	75.3	504	2876	0	35.1	4685.4		0	5.5	6.6	2.9	3.1	28.3	0	0	46.5		924.7	210.1	83.2	192.9	138.2	295.2	490.4	543.4	735	1726.7	0	0	5339.8
wt	2504.1	0	4682.7		429.4	310	140.9	105.7	549.8	1447.8	0	1.5	2985.1		0	0	0	0	0	0	0	0	0		549.1	186	62.2	205.8	151.3	313.8	486.1	555.5	744.9	1626.9	0	0	4881.6
wt	2708	0	4818.2		598.9	505.5	190.8	116.3	621.5	3221.9	0	6.7	5261.7		1.6	1.5	0	1.1	2.4	6.7	0	0	13.3		966.9	195.1	91.1	204.8	143.5	332.1	595.9	694.8	928.2	2007.2	0	0	6159.6
wt	2684.9	0	5038.6		807.6	597.8	220.7	107.1	667.6	3390.5	0	5.8	5797		3.9	0	0	4	1.3	13.1	0	0	22.3		1337.9	286.2	132.7	290.8	209.5	440.5	735.9	848.7	1063.3	2367.2	0	0	7712.7
wt	2744	0	5534.9		814.5	578.5	194.5	87.3	628.3	4081.7	0	1.8	6386.6		2.7	2.5	0	0	1.8	4.9	0	0	11.9		928.3	206.6	99.7	215.6	114.8	392.9	688.1	796.8	1059.7	2209.5	0	0	6711.9
wt	2536.3	0	4954.6		467.3	274.5	140.3	97.4	630.3	1875.7	0	14.7	3500.2		0	0	0	0	2.9	5.7	0	0	8.7		361.7	165.1	60.6	169.5	85	293.7	517.5	735.4	974.6	2151.5	0	0	5514.6
wt	2520.9	0	4587.1		435.9	376.6	115.7	46.8	606.1	2658.8	0	8.6	4248.4		0	0	0	0	3.4	3.1	0	0	6.5		460.7	147.1	61.5	168	67.1	257.8	445.8	588.5	812.2	1660.2	0	0	4669
fat-1	2200.1	26.8	4512.9		880.3	405.7	211.7	75.3	776.6	1690.9	0	11.4	4051.9		8.7	8.9	16.9	24.2	7.3	37.1	0	0	103.1		1413.9	334.8	133.8	345.5	222	438	777.9	887.4	1164.9	2465.2	0	0	8183.3
fat-1	2441.5	63.6	4893		992	738.3	240	105.8	790.2	2965.5	0	13.5	5845.3		23.2	6.9	0	29.6	14.8	57.2	0	0	131.8		882.7	325.1	122.3	345.7	159.5	526	902.7	1154.6	1544	3382.4	0	0	9345
fat-1	2613.2	21.4	5451.7		822.9	407.4	192.6	162.3	680.2	2188.4	0	4.8	4458.6		11.2	8.2	17.1	25.6	16.4	49.4	0	0	128		882.8	253.5	78.8	195.8	96.3	367.2	607.9	771.4	1054.4	2273.7	0	0	6581.9
fat-1	2418.5	26.4	4756.7		483.5	297.8	156.6	107.3	408.8	2283.9	0	15.8	3753.6		8.5	2.5	46.2	9.9	4.1	46.6	0	0	117.8		653.9	141.4	66.9	129.8	52.4	226	396.9	439	601.7	1269.7	0	0	3977.7

## Sheet: histology
Group	Phenotype	area (pixels2)
		Assessment 1	Assessment 2	Assessment 3
control	wt	262764	267646	261387
control	wt	280000	280000	280000		estimate (tissue partially damaged)
control	wt	285276	267573	261880
control	wt	264987	301848	277721
control	fat-1	306129	279379	308382
control	fat-1	294861	253404	273417
control	fat-1	316517	316073	242814
						(one control fat-1 brain was lost during freezing)
cuprizone	wt	98311	102207	147555
cuprizone	wt	99937	160134	198677
cuprizone	wt	57973	61483	99235
cuprizone	wt	120996	130490	53600
cuprizone	wt	65422	96401	74468
cuprizone	fat-1	162764	160651	223584
cuprizone	fat-1	66485	68418	78708
cuprizone	fat-1	78313	78784	127335
cuprizone	fat-1	60651	54651	87265
cuprizone	fat-1	216682	186333	142942
cuprizone	fat-1	113075	142104	148718
cuprizone	fat-1	118967	128409	107376
remyelination	wt	139671	156948	179137
remyelination	wt	227299	214528	285326
remyelination	wt	156357	163545	148695
remyelination	wt	132290	121580	177538
remyelination	wt	68169	88214	86917
remyelination	fat-1	272691	261920	271215
remyelination	fat-1	275669	266280	269756
remyelination	fat-1	172717	171325	179790
remyelination	fat-1	319402	310518	286342
remyelination	fat-1	123561	117076	144996
remyelination	fat-1	289343	281753	313702
remyelination	fat-1	237185	255159	219197

## Sheet: weight
Group	Phenotype	weight (in g) over time (in weeks)
		1	1.4	1.8	2	2.5	3	3.5	4	4.5	5	5.5	6	weeks
control	wt	20	20	21	21	21	21	22	23	23	23	24	23
control	wt	19	19	20	20	20	19	20	21	21	20	22	22
control	wt	20	20	21	21	21	22	22	24	24	26	26	26
control	wt	21	21	21	21	21	21	21	22	21	23	23	24
control	fat-1	19	20	20	20	20	21	21	21	21	22	23	23
control	fat-1	18	18	19	19	19	20	20	22	24	25	24	24
control	fat-1	20	20	21	21	21	22	22	23	22	22	22	23
control	fat-1	19	19	20	20	20	19	20	21	21	20	22	21
cuprizone	wt	20	19	18	17	17	18	19	17	17	18	17	17
cuprizone	wt	20	19	18	19	17	18	18	18	18	17	17	16
cuprizone	wt	20	19	18	16	16	17	17	16	16	16	15	15
cuprizone	wt	16	14	15	15	15	14	14	15	14	13	14	14
cuprizone	wt	19	18	17	16	16	16	16	15	15	16	15	15
remyelin	wt	18	17	16	15	15	16	16	15	15	15	14	15
remyelin	wt	19	18	17	16	15	15	15	15	14	14	14	14
remyelin	wt	17	17	16	15	14	15	15	15	14	14	15	14
remyelin	wt	19	18	18	16	15	16	16	15	15	15	14	15
remyelin	wt	17	17	16	15	14	14	14	13	14	14	13	13
cuprizone	fat-1	21	19	18	18	18	18	18	18	18	17	17	18
cuprizone	fat-1	18	17	17	17	15	16	16	16	15	16	16	15
cuprizone	fat-1	18	17	16	16	16	15	16	16	15	15	14	15
cuprizone	fat-1	17	16	16	15	16	15	15	14	15	14	14	14
cuprizone	fat-1	21	20	19	17	18	17	17	17	16	17	17	16
cuprizone	fat-1	18	18	17	15	15	14	15	14	14	14	13	14
cuprizone	fat-1	18	17	16	14	14	14	16	15	14	14	13	13
remyelin	fat-1	19	20	18	17	18	18	18	17	17	16	17	17
remyelin	fat-1	20	19	18	15	15	16	17	16	16	16	15	15
remyelin	fat-1	22	21	20	18	18	18	18	18	17	18	17	17
remyelin	fat-1	20	20	18	17	17	17	17	17	17	16	17	17
remyelin	fat-1	20	19	18	17	17	17	17	16	17	16	16	16
remyelin	fat-1	19	18	17	15	15	16	16	15	15	15	16	15
remyelin	fat-1	20	18	18	17	16	16	16	16	16	15	15	14
